# Supplementary material for: Highly local sources and large spatial variations in PM2.5 across a city: evidence from a city-wide sensor network in Cork, Ireland
Source: Royal Society of Chemistry journal article supplement (doi:10.1039/d2ea00177b), 2023-01-01
Supplement: d2ea00177b1.pdf [file d2ea00177b1.pdf]

Table S1: Correlations between sensor A and sensor B (validated data) within each PurpleAir device unit for the total data set.

| Device ID | R <sup>2</sup> | Slope | y-intercept |
|-----------|----------------|-------|-------------|
| ccc1      | 0.996          | 1.003 | 0.4         |
| ccc2      | 0.998          | 0.999 | - 0.4       |
| ccc3      | 0.999          | 1.032 | 0.0         |
| ccc4      | 0.999          | 1.010 | 0.2         |
| ccc5      | 0.999          | 0.961 | - 0.3       |
| ccc6      | 0.999          | 1.027 | 0.1         |
| ccc7      | 0.993          | 0.975 | - 0.5       |
| ccc8      | 0.995          | 1.013 | 0.8         |
| ccc9      | 1.000          | 1.006 | - 0.1       |
| ccc11     | 0.999          | 1.013 | 0.1         |
| ccc12     | 0.986          | 0.985 | -0.2        |
| ccc13     | 0.999          | 1.008 | 0.3         |
| ccc14     | 0.999          | 1.044 | 0.4         |
| ccc15     | 0.999          | 1.021 | 0.2         |
| mtu       | 0.996          | 1.029 | 0.2         |
| ucc       | 0.998          | 0.993 | 1.1         |

Table S2: PurpleAir devices and periods when co-located at the UCC Air Quality Monitoring Station.

| Unit name | Operational dates        |
|-----------|--------------------------|
| Unit 1    | Nov '20 – June '21       |
| Unit 2    | 1 July '21 – 14 July '21 |
| Unit 3    | 1 July '21 – 14 July '21 |
| Unit 4    | 1 July '21 – 14 July '21 |
| Unit 5    | 1 July '21 – 14 July '21 |

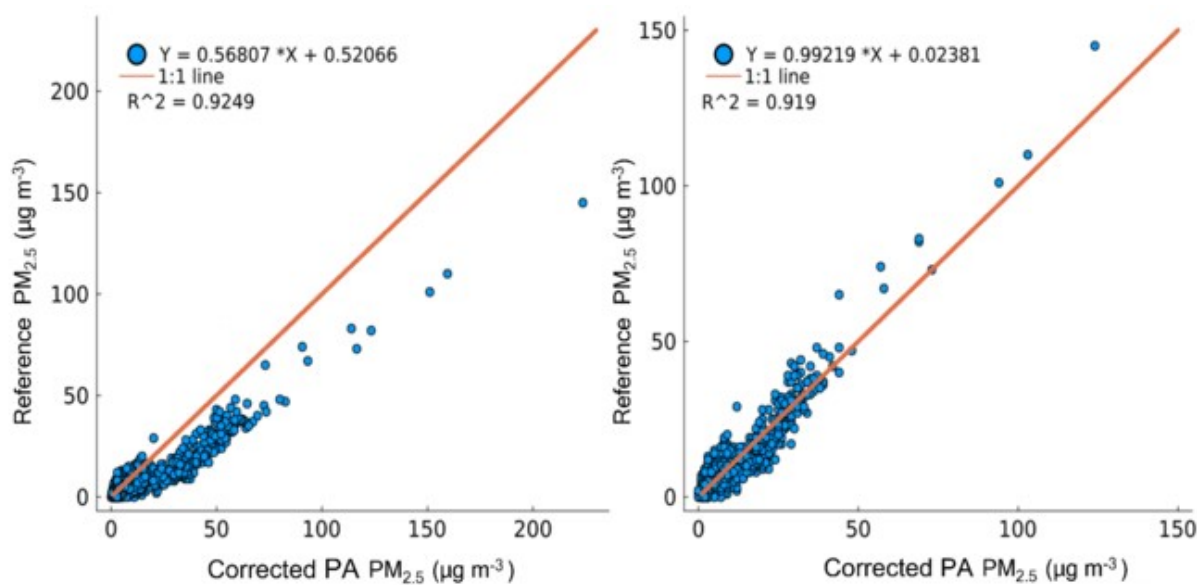

Figure S1: Linear fit of hourly reference test data with uncorrected and corrected Unit 1 data.

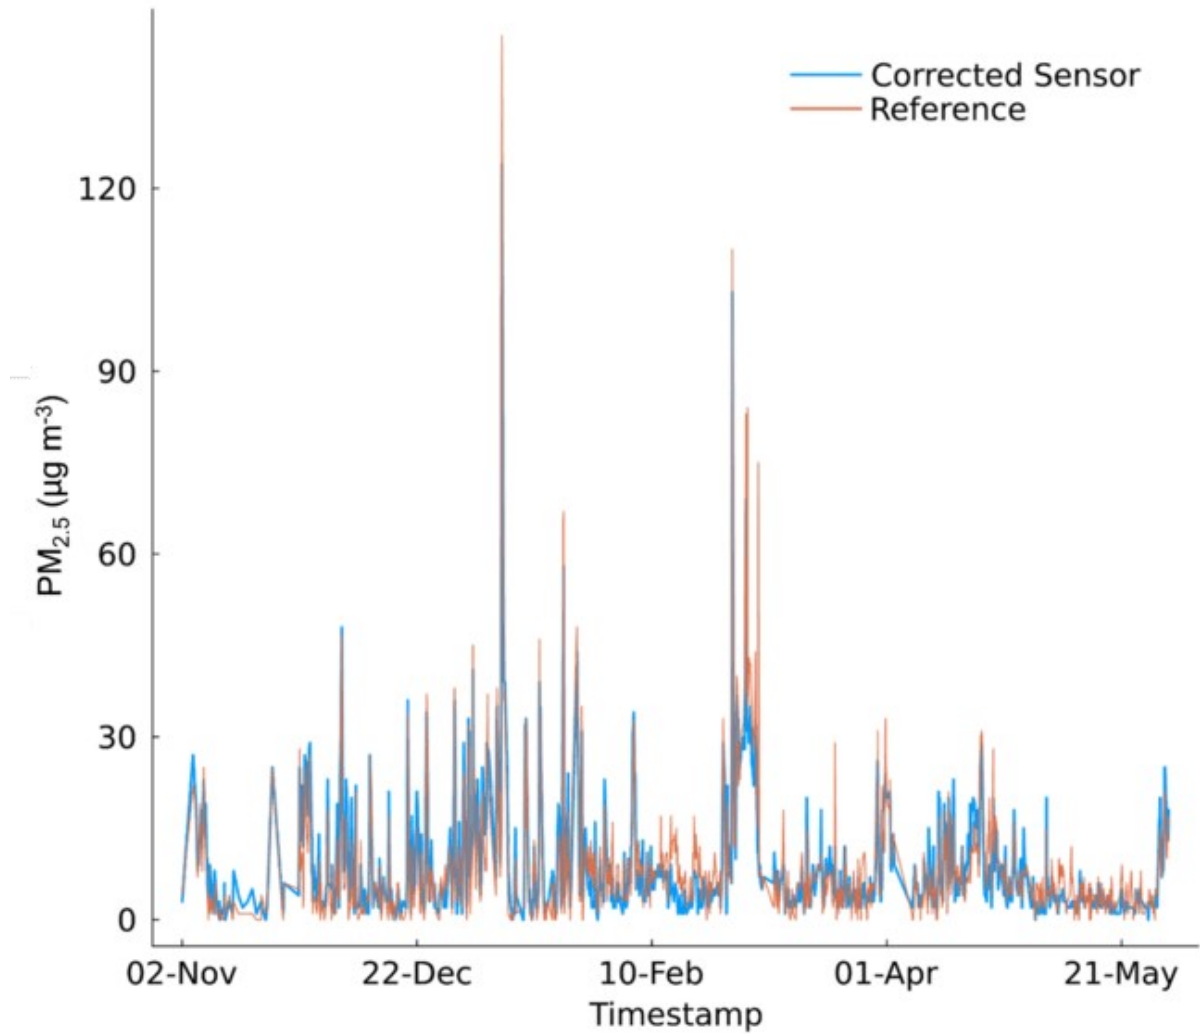

Figure S2: Time series of hourly corrected Unit 1 and hourly reference model testing data.

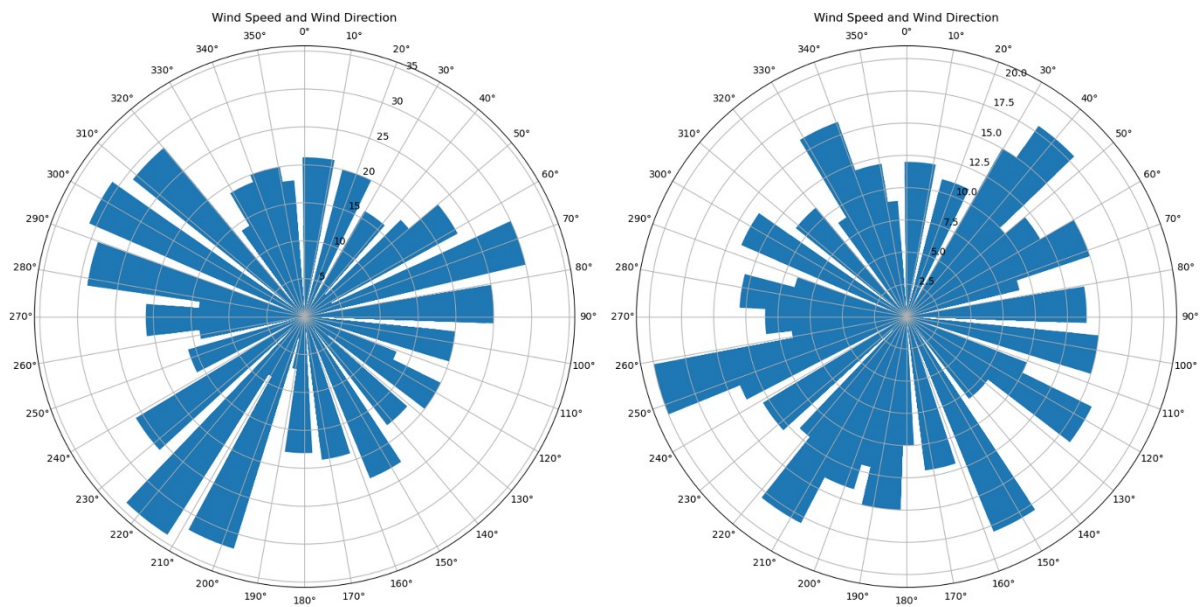

Figure S3: Wind roses showing the recorded wind speeds and direction at Cork City Airport during December 2021 (left) and June 2021 (right).

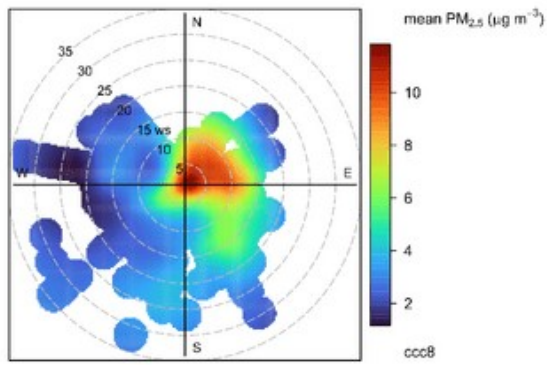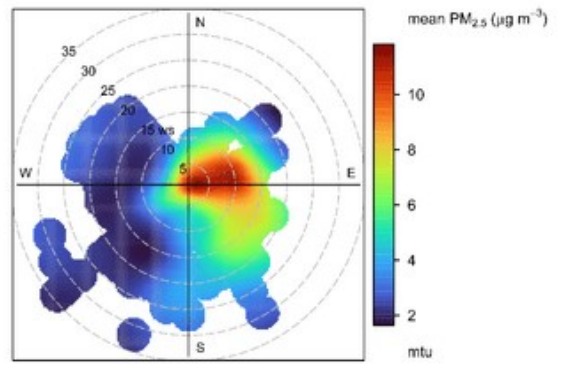

a)

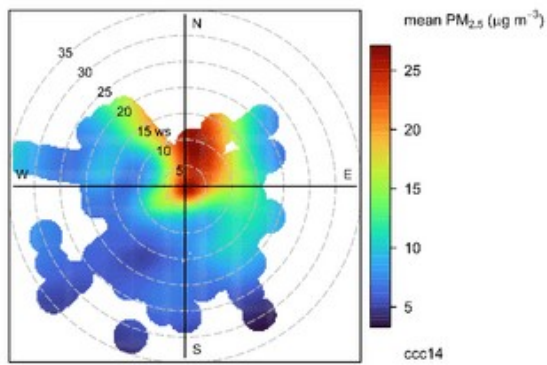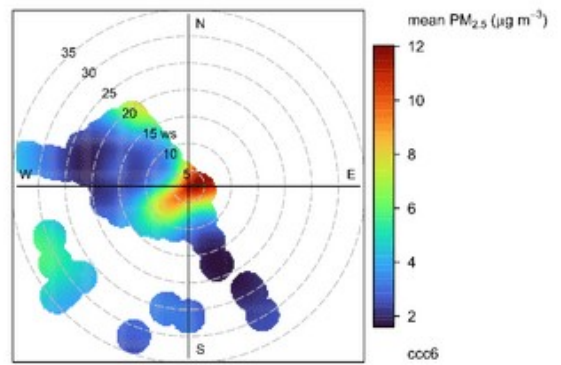

b)

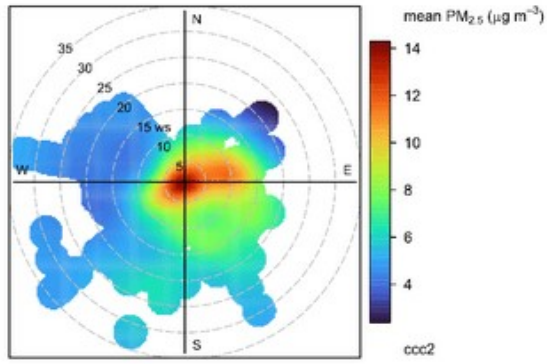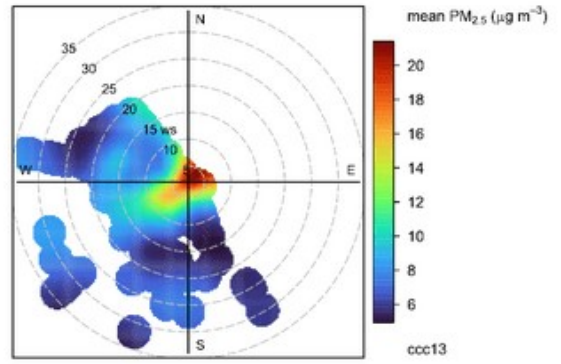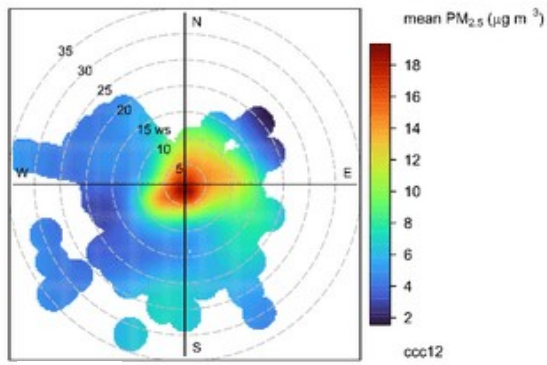

c)

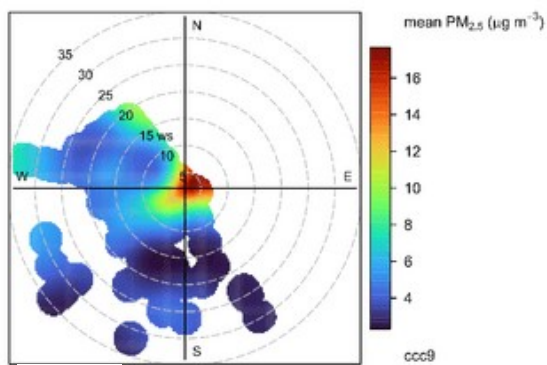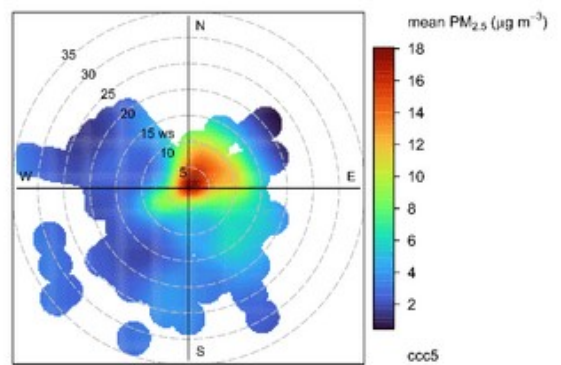

d)

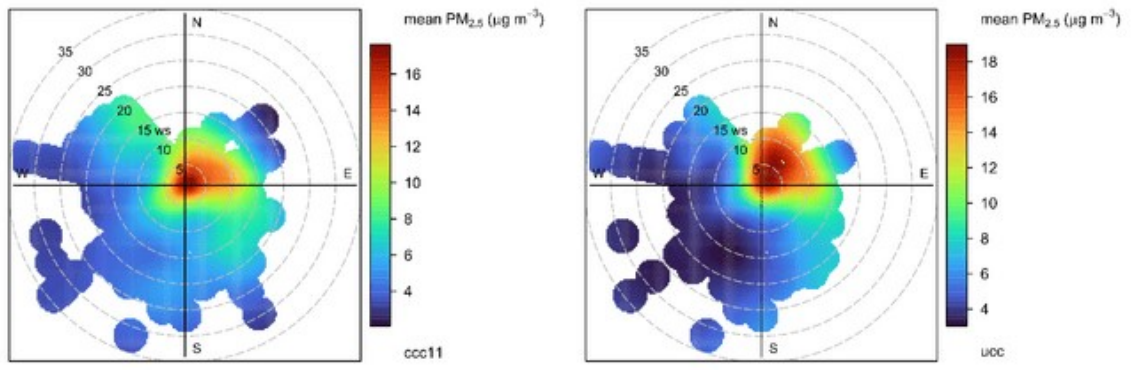

e)

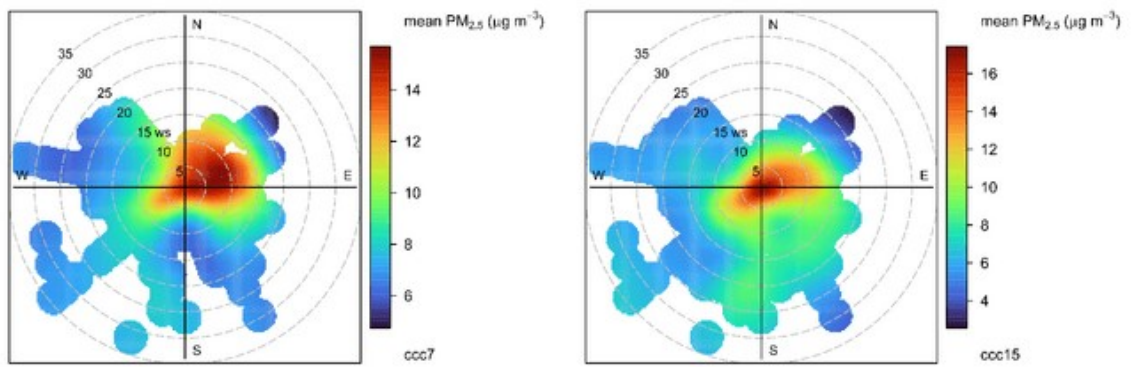

f)

Figure S4: Polar plots for PA devices per location type – a) West, b) North, c) East, d) South, e) City centre, f) Commuter towns
